# Supplementary material
Source: PubMed Central journal article supplement (PMC7194029)
Supplement: NIHMS1569218-supplement-1.pdf [file NIHMS1569218-supplement-1.pdf]

**Cell, Volume 180**

## **Supplemental Information**

### **Tissue Determinants of Human NK**

#### **Cell Development, Function, and Residence**

**Pranay Dogra, Chiara Rancan, Wenji Ma, Marta Toth, Takashi Senda, Dustin J. Carpenter, Masaru Kubota, Rei Matsumoto, Puspa Thapa, Peter A. Szabo, Maya Meimei Li Poon, Jacky Li, Janice Arakawa-Hoyt, Yufeng Shen, Lawrence Fong, Lewis L. Lanier, and Donna L. Farber**

## Tissue determinants of human NK cell development, function and residence

Pranay Dogra, Chiara Rancan, Wenji Ma, Marta Toth, Takashi Senda, Dustin J. Carpenter, Masaru Kubota, Rei Matsumoto, Puspa Thapa, Peter A. Szabo, Maya Meimei Li Poon, Jacky Li, Janice Arakawa-Hoyt, Yufeng Shen, Lawrence Fong, Lewis L. Lanier, and Donna L. Farber

Table S1. Related to Figures 1,2,3,4,5,6,7. Information about donors used in the study

| Donor number | Age (years) | Sex    | Ethnicity/race            | Cause of death                       | EBV Status | CMV status |
|--------------|-------------|--------|---------------------------|--------------------------------------|------------|------------|
| 339          | 5           | MALE   | Black or African American | OTHER SPECIFY : INFECTION: BACTERIAL | Negative   | Negative   |
| 251          | 9           | MALE   | White                     | ANOXIA                               | Positive   | Negative   |
| 392          | 9           | FEMALE | Hispanic/Latino           | ANOXIA                               | Positive   | Negative   |
| 351          | 11          | FEMALE | Black or African American | ANOXIA                               | Positive   | Negative   |
| 360          | 16          | MALE   | Hispanic/Latino           | HEAD TRAUMA                          | Positive   | Positive   |
| 430          | 18          | MALE   | Black or African American | CEREBROVASCULAR/STROKE               | Positive   | Negative   |
| 400          | 18          | MALE   | White                     | ANOXIA                               | Positive   | Positive   |
| 408          | 18          | MALE   | Black or African American | ANOXIA                               | Negative   | Positive   |
| Npod6503     | 18          | MALE   | Unknown                   | ANOXIA                               | Unknown    | Positive   |
| 442          | 19          | MALE   | Hispanic/Latino           | HEAD TRAUMA                          | Positive   | Positive   |
| 340          | 23          | MALE   | Black or African American | HEAD TRAUMA                          | Positive   | Positive   |
| 361          | 24          | MALE   | Black or African American | HEAD TRAUMA                          | Positive   | Positive   |
| 358          | 24          | MALE   | Hispanic/Latino           | ANOXIA                               | Positive   | Negative   |
| 365          | 28          | FEMALE | Hispanic/Latino           | ANOXIA                               | Positive   | Positive   |
| 425          | 30          | FEMALE | White                     | ANOXIA                               | Positive   | Negative   |
| 331          | 32          | MALE   | Black or African American | HEAD TRAUMA                          | Positive   | Negative   |
| 346          | 32          | MALE   | White                     | HEAD TRAUMA                          | Positive   | Negative   |
| 397          | 34          | MALE   | White                     | ANOXIA                               | Positive   | Negative   |
| 429          | 36          | MALE   | Hispanic/Latino           | ANOXIA                               | Positive   | Positive   |
| 359          | 38          | FEMALE | Asian                     | ANOXIA                               | Positive   | Positive   |
| 419          | 38          | MALE   | White                     | ANOXIA                               | Positive   | Negative   |
| 332          | 38          | MALE   | Black or African American | HEAD TRAUMA                          | Positive   | Positive   |
| 441          | 40          | MALE   | Hispanic/Latino           | ANOXIA                               | Positive   | Negative   |
| 447          | 40          | FEMALE | Hispanic/Latino           | CEREBROVASCULAR/STROKE               | Positive   | Positive   |
| 344          | 44          | MALE   | Black or African American | CEREBROVASCULAR/STROKE               | Positive   | Negative   |
| 390          | 45          | MALE   | Asian                     | ANOXIA                               | Positive   | Negative   |
| 309          | 45          | FEMALE | Black or African American | CEREBROVASCULAR/STROKE               | Positive   | Positive   |
| 407          | 45          | MALE   | Hispanic/Latino           | CEREBROVASCULAR/STROKE               | Positive   | Positive   |
| 445          | 47          | MALE   | Black or African American | CEREBROVASCULAR/STROKE               | Positive   | Positive   |
| 413          | 48          | FEMALE | White                     | ANOXIA                               | Positive   | Positive   |
| 341          | 49          | MALE   | White                     | CEREBROVASCULAR/STROKE               | Positive   | Negative   |
| 338          | 49          | MALE   | Hispanic/Latino           | ANOXIA                               | Positive   | Positive   |
| 350          | 49          | FEMALE | White                     | ANOXIA                               | Positive   | Positive   |
| 448          | 50          | FEMALE | White                     | ANOXIA                               | Positive   | Positive   |
| 418          | 52          | MALE   | Black or African American | CEREBROVASCULAR/STROKE               | Positive   | Negative   |
| 456          | 53          | MALE   | White                     | ANOXIA                               | Positive   | Negative   |
| 380          | 53          | FEMALE | White                     | CEREBROVASCULAR/STROKE               | Positive   | Negative   |
| 367          | 54          | FEMALE | Unknown                   | ANOXIA                               | Positive   | Positive   |
| 396          | 56          | MALE   | Black or African American | ANOXIA                               | Positive   | Positive   |
| 342          | 59          | MALE   | Hispanic/Latino           | ANOXIA                               | Positive   | Positive   |
| 422          | 60          | MALE   | White                     | ANOXIA                               | Positive   | Negative   |
| 374          | 62          | FEMALE | White                     | ANOXIA                               | Positive   | Positive   |
| 348          | 62          | FEMALE | Hispanic/Latino           | CEREBROVASCULAR/STROKE               | Positive   | Positive   |
| 439          | 62          | FEMALE | White                     | CEREBROVASCULAR/STROKE               | Positive   | Negative   |
| 438          | 64          | MALE   | Black or African American | CEREBROVASCULAR/STROKE               | Positive   | Positive   |
| 412          | 66          | MALE   | White                     | ANOXIA                               | Positive   | Negative   |
| 308          | 68          | MALE   | Hispanic/Latino           | HEAD TRAUMA                          | Positive   | Positive   |
| 349          | 69          | FEMALE | Hispanic/Latino           | CEREBROVASCULAR/STROKE               | Positive   | Positive   |
| 427          | 69          | MALE   | Hispanic/Latino           | HEAD TRAUMA                          | Positive   | Positive   |
| 455          | 70          | MALE   | Black or African American | CEREBROVASCULAR/STROKE               | Positive   | Positive   |
| 450          | 71          | FEMALE | Hispanic/Latino           | ANOXIA                               | Positive   | Positive   |
| 424          | 71          | FEMALE | Black or African American | CEREBROVASCULAR/STROKE               | Positive   | Positive   |
| 411          | 72          | MALE   | Hispanic/Latino           | ANOXIA                               | Positive   | Positive   |
| 347          | 73          | FEMALE | Asian                     | CEREBROVASCULAR/STROKE               | Positive   | Positive   |
| 345          | 73          | FEMALE | White                     | ANOXIA                               | Positive   | Positive   |
| 464          | 75          | FEMALE | Asian                     | ANOXIA                               | Positive   | Positive   |
| 337          | 76          | FEMALE | White                     | CEREBROVASCULAR/STROKE               | Positive   | Positive   |
| 423          | 83          | MALE   | White                     | ANOXIA                               | Positive   | Positive   |
| 364          | 87          | FEMALE | White                     | CEREBROVASCULAR/STROKE               | Positive   | Positive   |
| 391          | 92          | FEMALE | Hispanic/Latino           | CEREBROVASCULAR/STROKE               | Positive   | Positive   |

Table S3. Related to Figure 4. Pathways enriched in CD56<sup>bright</sup>CD16<sup>-</sup> vs. CD56<sup>dim</sup>CD16<sup>+</sup> NK cells

| Term                                                                                       | Overlap | Enrich_log2FC | P.value     | Adjusted.P.value | Genes                                                                                                     | Direction | Source |
|--------------------------------------------------------------------------------------------|---------|---------------|-------------|------------------|-----------------------------------------------------------------------------------------------------------|-----------|--------|
| Cytokine-cytokine receptor interaction_Homo sapiens_hsa04060                               | 20/265  | 2.714301874   | 3.43E-11    | 6.37E-09         | IL1R1;FLT3;IL23R;IFNGR2;FLT4;LIF;IL18;CXCR6;BMP2;CXCR3;KIT;XCL2;CD27;XCL1;TNFSF8;CCR7;LTB;CCR5;IL6ST;IL7R | up        | KEGG   |
| Jak-STAT signaling pathway_Homo sapiens_hsa04630                                           | 8/158   | 2.13844158    | 0.000497145 | 0.011558613      | SOCS3;CDKN1A;MYC;IL23R;IFNGR2;LIF;IL6ST;IL7R                                                              | up        | KEGG   |
| Chemokine signaling pathway_Homo sapiens_hsa04062                                          | 8/187   | 1.895327869   | 0.001483821 | 0.021926169      | CXCR3;XCL2;ADCY3;XCL1;CCR7;CXCR6;CCR5;GNAI1                                                               | up        | KEGG   |
| Focal adhesion_Homo sapiens_hsa04510                                                       | 7/202   | 1.591365768   | 0.009013482 | 0.062092877      | COL4A4;FLT4;ITGA1;TNR;FLNB;COL9A2;BIRC3                                                                   | up        | KEGG   |
| interferon-gamma-mediated signaling pathway (GO:0060333)                                   | 11/204  | 2.229228605   | 2.54E-05    | 0.010921785      | SOCS3;GREM2;CIITA;FLT3;IFNGR2;KIT;XCL2;XCL1;HLA-DRA;HLA-DRB3;IL6ST                                        | up        | GO-BP  |
| positive regulation of MAPK cascade (GO:0043410)                                           | 10/194  | 2.164237581   | 8.66E-05    | 0.022400282      | BMP2;FLT3;INSR;LRRK2;FLT4;KIT;LPAR1;LIF;DAB2IP;AXIN2                                                      | up        | GO-BP  |
| interleukin-1-mediated signaling pathway (GO:0070498)                                      | 9/157   | 2.317526581   | 8.72E-05    | 0.022400282      | SOCS3;GREM2;IL1R1;FLT3;KIT;XCL2;DAB2IP;XCL1;IL6ST                                                         | up        | GO-BP  |
| Notch signaling pathway (GO:0007219)                                                       | 5/46    | 3.240588467   | 0.000179759 | 0.022400282      | BMP2;MAML2;MYC;DTX1;MAML3                                                                                 | up        | GO-BP  |
| regulation of natural killer cell proliferation involved in immune response (GO:0032820)   | 10/190  | 1.947027725   | 0.000293849 | 0.054212009      | NCR3;FCGR3A;SIGLEC9;KIR2DS2;LILRB1;KIR3DL1;CD247;KIR2DL1;KIR2DL2;KIR2DL3                                  | down      | GO-BP  |
| regulation of natural killer cell differentiation involved in immune response (GO:0032826) | 10/190  | 1.947027725   | 0.000293849 | 0.054212009      | NCR3;FCGR3A;SIGLEC9;KIR2DS2;LILRB1;KIR3DL1;CD247;KIR2DL1;KIR2DL2;KIR2DL3                                  | down      | GO-BP  |
| positive regulation of cell migration (GO:0030335)                                         | 13/193  | 1.421280471   | 0.001244519 | 0.107302814      | PDGFRB;INSR;SPHK1;SYNE2;DAB2;BMP2;ABI3;FAM110C;CTSH;FLNA;SPRY2;CCR7;LGR6                                  | both      | GO-BP  |
| plasmacytoid dendritic cell chemotaxis (GO:0002410)                                        | 5/16    | 3.635225885   | 3.42E-05    | 0.017421465      | CXCR1;GPR183;CXCR2;CCR7;CCR5                                                                              | both      | GO-BP  |

Table S6. Related to Figure 7. Cluster contribution

| <b>Cluster ID</b> | <b>% of total NK cells analyzed</b> |
|-------------------|-------------------------------------|
| 1                 | 8.7                                 |
| 2                 | 9.8                                 |
| 3                 | 2.5                                 |
| 4                 | 1.7                                 |
| 5                 | 11                                  |
| 6                 | 8.8                                 |
| 7                 | 1.3                                 |
| 8                 | 7.7                                 |
| 9                 | 6.7                                 |
| 10                | 4.2                                 |
| 11                | 6.6                                 |
| 12                | 0.9                                 |
| 13                | 5.6                                 |
| 14                | 9.7                                 |
| 15                | 14.8                                |
